# Supplementary material for: Spatial modeling could not differentiate early SARS-CoV-2 cases from the distribution of humans on the basis of climate in the United States
Source: PeerJ journal article supplement (doi:10.7717/peerj.10140), 2020-10-26

## Overlap

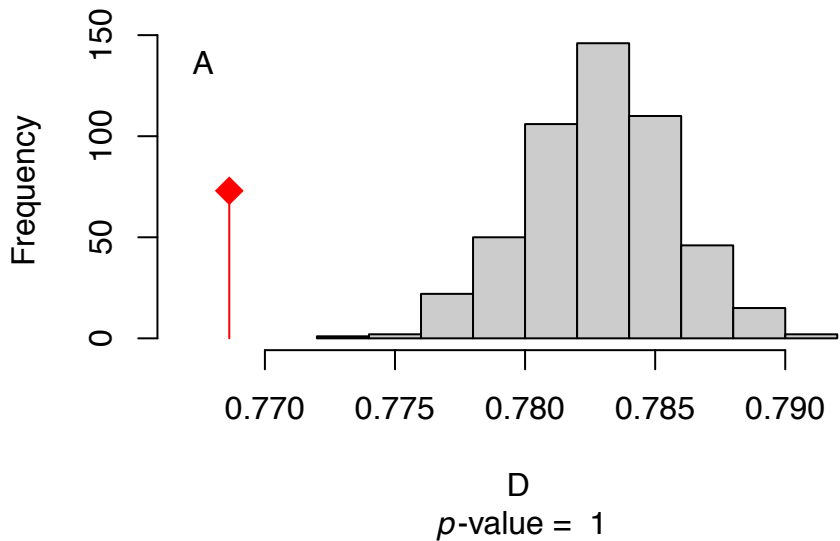

## Similarity

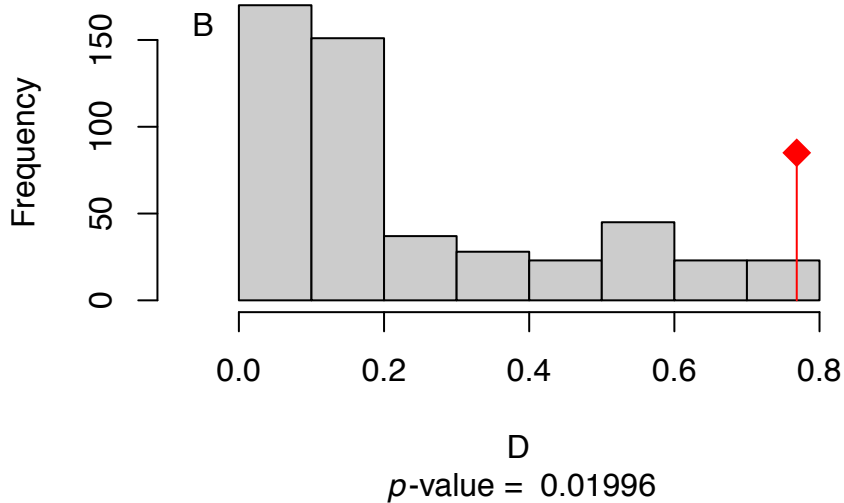

Supplement: FigureS3_SWC_FINAL_KT_staff.pdf [file FigureS3_SWC_FINAL_KT_staff.pdf]
